# Supplementary material for: Novel protonated Fe-containing mesoporous silica nanoparticle catalyst: excellent performance cyclohexane oxidation
Source: Royal Society of Chemistry journal article supplement (doi:10.1039/c7ra02280h), 2017-01-01

## Appendix A

### XRF analysis:

Ministry of Industry,  
Mine and Trade

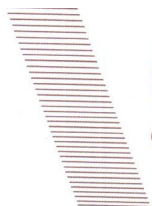

  
GEOLOGICAL SURVEY OF IRAN

Date: .....

No: .....

Ref: .....

In The Name Of GOD  
Mineralogy laboratories group  
XRF (Magix Pro)

Requested by : M.R.Sazegar

Number of Samples : 3

Report Date : 5/4/2017

Report No. : 96-84

#### Semi Quantitative Analysis

| Lab. No.                       | 1      | 2        |
|--------------------------------|--------|----------|
| Field No.                      | Fe-MSN | H/Fe-MSN |
| Formula                        | (%)    | (%)      |
| SiO <sub>2</sub>               | 93.94  | 92.96    |
| Al <sub>2</sub> O <sub>3</sub> | 0.16   | 0.22     |
| Fe <sub>2</sub> O <sub>3</sub> | 3.18   | 3.25     |
| CaO                            | 0.11   | 0.15     |
| Na <sub>2</sub> O              | 0.12   | 0.16     |
| MgO                            | 0.01   | 0.02     |
| K <sub>2</sub> O               | n.d*   | n.d*     |
| TiO <sub>2</sub>               | 0.01   | 0.02     |
| MnO                            | 0.02   | 0.03     |
| P <sub>2</sub> O <sub>5</sub>  | 0.01   | 0.02     |
| Cl                             | 0.02   | 0.03     |
| L.O.I.                         | 2.37   | 3.08     |

Analysis by : Dalvand

\* n.d = Not detected

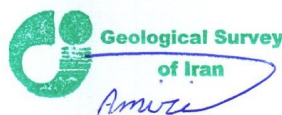

## Appendix B

ICP analysis:

Ministry of Industry,  
Mine and Trade

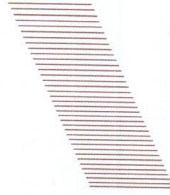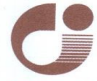

GEOLOGICAL SURVEY OF IRAN

Date: .....  
No: .....  
Ref: .....

### Laboratory group Analytical chemistry ICP Varian

Date: 5/4/2017  
NO. : 96-84

Applicant: M.R.Sazegar  
NO. of Sample: 2

| Lab. No.  | 1      | 2        |
|-----------|--------|----------|
| Field No. | Fe-MSN | H/Fe-MSN |
| Element   | ppm    | ppm      |
| Ag        | < 1    | < 1      |
| As        | 19.0   | 20.0     |
| B         | < 1    | < 1      |
| Ba        | < 1    | < 1      |
| Be        | 2.0    | 2.0      |
| Cd        | < 1    | < 1      |
| Ce        | < 1    | < 1      |
| Co        | 83.0   | 85.0     |
| Cr        | < 1    | < 1      |
| Cs        | 2.0    | 3.0      |
| Cu        | 9.0    | 10.0     |
| Ge        | < 1    | < 1      |
| Hg        | < 1    | < 1      |
| La        | < 1    | < 1      |
| Li        | 4.0    | 5.0      |
| Mn        | 150.0  | 226.0    |
| Mo        | 30.0   | 32.0     |
| Nb        | < 1    | < 1      |
| Ni        | 3.0    | 4.0      |
| P         | 43.0   | 86.0     |
| Pb        | 190.0  | 193.0    |
| Rb        | 19.0   | 19.0     |
| S         | < 1    | < 1      |
| Sb        | 6.0    | 7.0      |
| Sc        | < 1    | < 1      |
| Se        | < 1    | < 1      |
| Sn        | 2.0    | 2.0      |
| Sr        | 36.0   | 38.0     |
| Te        | < 1    | < 1      |
| Ti        | 57.0   | 118.0    |
| V         | 16.0   | 16.0     |
| Y         | 20.0   | 21.0     |
| Yb        | 8.0    | 9.0      |
| Zn        | 324.0  | 327.0    |
| Zr        | 17.0   | 17.0     |
| Cl        | 230.0  | 289.0    |

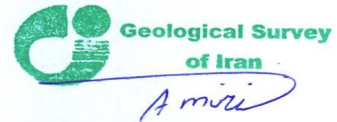

Operator: A.Solgi

# Appendix C

$^1\text{H}$  NMR spectroscopy:

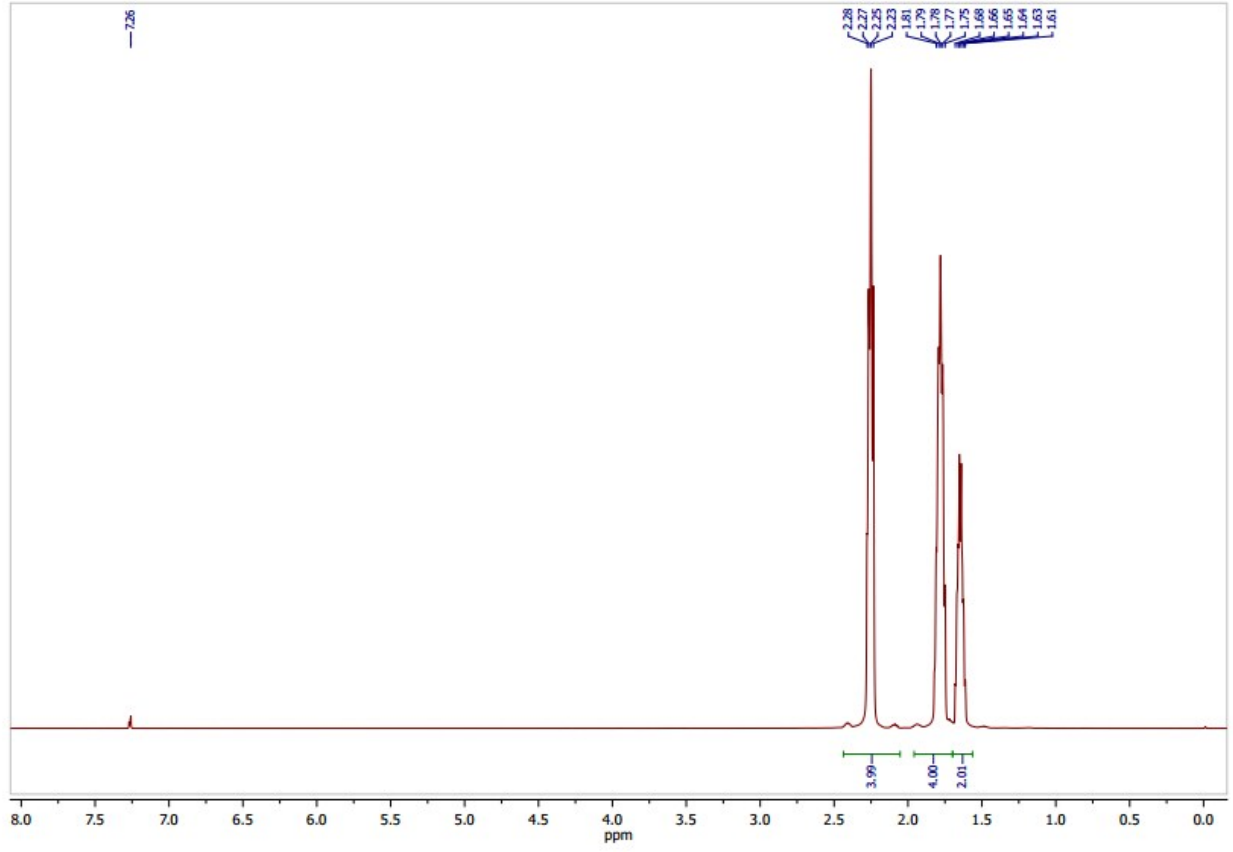

## Appendix D

$^{13}\text{C}$  NMR spectroscopy:

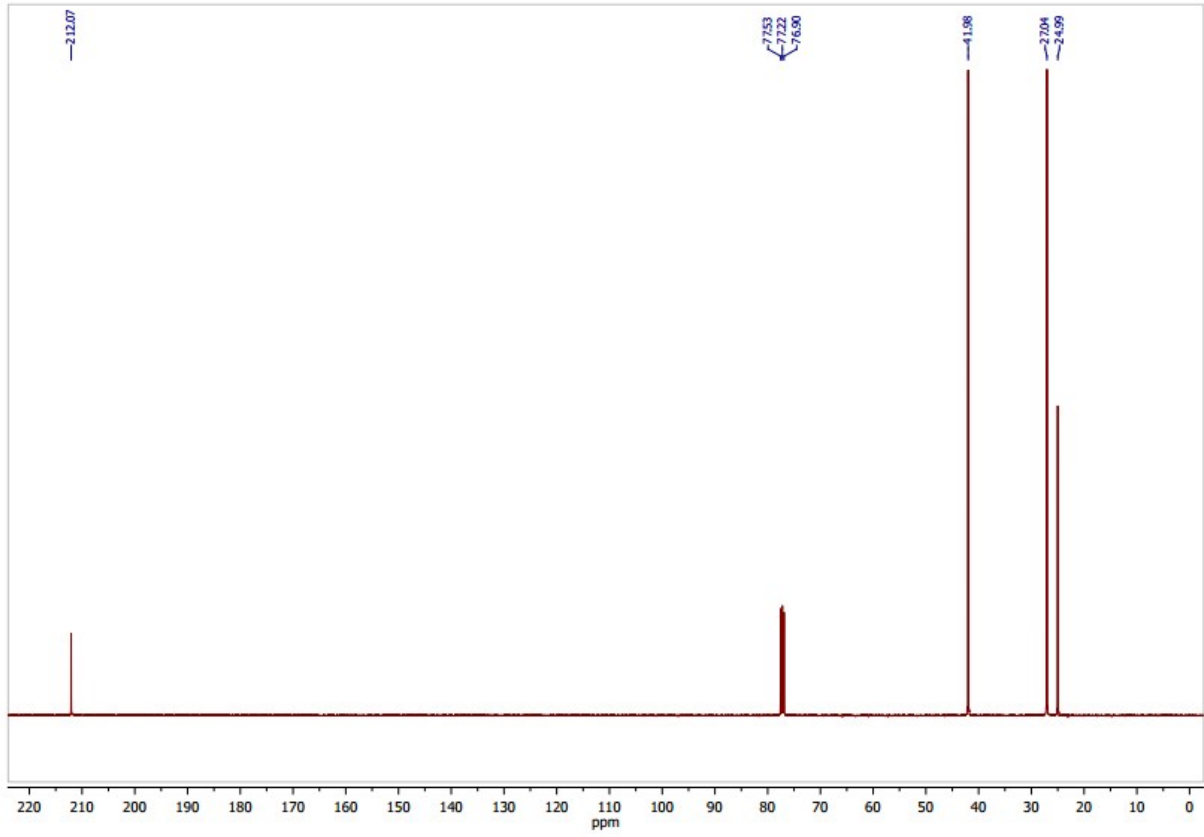

Supplement: c7ra02280h1.pdf [file c7ra02280h1.pdf]
